# Supplementary material for: Assessment of contamination pattern of medicinal plants with heavy metals in polluted soils
Source: Research Square preprint supplement (doi:10.21203/rs.3.rs-7173256/v1), 2025-09-10
Supplement: Supplementary file 1 [file 7740d35d03a8e8a67f56738c.docx]

Accumulation patterns and health risk assessment of elements with medicinal plants from contaminated area of India

Dinesh Verma, Prasanna Kumar Sharma, Piyush Kumar Pandey, Khageshwar Singh Patel, Simge Varol, Sema Yurdakul, Pablo Martín‑Ramos, and Damien Blaudez

| **Table S1** | Agronomical and taxonomical detail of medicinal plants. |
| --- | --- |
| **Table S2** | Distribution of element in field soil of Ambagarh Chowki field soil. |
| **Table S3** | Soil pollution indices. |
| **Table S4** | Tf value of elements in the bark. |
| **Table S5** | Tf value of elements in leaf. |
| **Table S6** | Uptake (Uf) of element from bark to leaf. |
| **Table S7** | Uptake (Uf) of element from bark to fruit mesocarp. |
| **Table S8** | Uptake (Uf) of element from bark to seeds. |
| **Table S9** | Effect of plant nature in concentration of elements in bark, leaf, and seed. |
| **Table S10** | Source apportionment of elements. |
| **Table S11** | Observed PTDIs value of As, Cu, Pb and Cd. |
| **Table S12** | Health assessment of As in the bark and leaf. |
| **Table S13** | Health assessment of Cd in the bark and leaf. |
| **Table S14** | Health assessment of Pb in the bark and leaf. |
| **Table S15** | HI value for As, Pb, Cd and Cu in bark and leaf |
|  |  |

| **Table S1**. Agronomical and taxonomical detail of medicinal plants. | | | | |
| --- | --- | --- | --- | --- |
| **S. No.** | **Botanical name** | **Family** | **Uses** | **Ref.** |
| 1 | Aegle Marmelos ([L.](https://en.wikipedia.org/wiki/Carl_Linnaeus)) [Corrêa](https://en.wikipedia.org/wiki/Jos%C3%A9_Correia_da_Serra) | [Rutaceae](https://en.wikipedia.org/wiki/Rutaceae) | Aromatic tree grows in deciduous forest with therapeutic potentials | Tiwari et al. 2018 |
| 2 | Careya arborea Roxb. | [Lecythidaceae](https://en.wikipedia.org/wiki/Lecythidaceae) | Deciduous Ayurvedic tree having many pharmacological properties used for treatment of many diseases. | Ambardar N., Aeri 2013 |
| 3 | Eugenia jambolana/ Syzygium cumini ([L.](https://en.wikipedia.org/wiki/Carl_Linnaeus)) | [Myrtaceae](https://en.wikipedia.org/wiki/Myrtaceae) | Evergreen tropical tree, and fruit is used for miraculously in diabetes, and being good medicine for hyperglycemia, abdominal pain and dysentery. | Kumar et al. 2022 |
| 4 | Lawsonia inermis | [Lythraceae](https://en.wikipedia.org/wiki/Lythraceae) | It is an **ethnomedicinal plant** used cosmetically and medicinally | Abdulfatai and Ayotunde 2022 |
| 5 | Murraya koenigii/ Bergera koenigii ([L](https://en.wikipedia.org/wiki/Carl_Linnaeus)) | [Rutaceae](https://indiabiodiversity.org/species/list?taxon=3037) | Aromatic perennial shrub and leaves popularly used in Indian cuisine and Ayurvedic medicine. | Datta et al. 2023 |
| 6 | Moringa oleifera | [Moringaceae](https://en.wikipedia.org/wiki/Moringa_(genus)) | It is an indigenous tree, rich in minerals and bioactive compounds by protecting and nursing skin, hair and liver and prevent disease like cancer. | Gopalakrishnan et al. 2016 |
| 7 | Phylanthus emblica | [Phyllanthaceae](https://en.wikipedia.org/wiki/Phyllanthaceae) | It is an extraordinary commonly used medicinal delicious embolic myrobalan, myrobalan tree used in Indian Ayurvedic systems. | Irsyam et al. 2020 |
| 8 | Terminalia Arjuna | [Combretaceae](https://en.wikipedia.org/wiki/Combretaceae) | It is a large sized deciduous tree have good medical uses for heart and blood diseases. | Gupta et al. 2001 |
| 9 | Terminalia bellirica | [Combretaceae](https://en.wikipedia.org/wiki/Combretaceae) | A Large deciduous tree found through out India used in various traditional medicines to enhance immunity to fight against various diseases. | Das et al. 2020 |
| 10 | Terminalia Chebura | [Combretaceae](https://en.wikipedia.org/wiki/Combretaceae) | A large sized deciduous tree regarded as valuable and cheap sources of various phytoconstituents used in the development of drugs against various diseases. | Khan et al. 2016 |
| 11 | Tramarindus indica | [Fabaceae](https://en.wikipedia.org/wiki/Fabaceae) | **It is a tropical fruit tree has potential ethnomedicinal properties used in treatment of traditional diseases.** | Pinar 2014 |
| 12 | Albizizzia odoratissima | [Fabaceae](https://en.wikipedia.org/wiki/Fabaceae) | It is a medium deciduous tree used in Indian folk medicine has radical scavenging property and antimicrobial to treat numerous inflammatory pathologies. | Venkanna et al. 2017 |
| 13 | Acacia nilotica | [Fabaceae](https://en.wikipedia.org/wiki/Fabaceae) | It is an agroforestry **tree has potential source of tannins and other phytochemicals and drugs.** | Rather et al. 2015; Issoufou et al. 2020 |
| 14 | Albizzia lebbek (L.) Benth | [Fabaceae](https://en.wikipedia.org/wiki/Fabaceae) | A fast-growing tree used for fixing atmospheric nitrogen, production of tannins and ethanol, and medicines used for treatment of many diseases. | Balkrishna et al. 2022 |
| 15 | Azadirachta Indica | [Fabaceae](https://en.wikipedia.org/wiki/Fabaceae) | It is a fast-growing **tree** has antimicrobial potential used for traditional remedy of various human ailments. | Wylie and Merrell 2022 |
| 16 | Bauhinia Recemose Lam | [Fabaceae](https://en.wikipedia.org/wiki/Fabaceae) | Bauhinia is a medium sized deciduous tree have great medicinal potential in folklore medicine and used to treat many diseases | Fatima et al. et al. 2021 |
| 17 | Buchanania lancan | [Anacardiaceae](https://en.wikipedia.org/wiki/Anacardiaceae) | It is a tropical deciduous multipurpose tree found in Asian and African countries used in cosmetic, industrial and pharmaceutical products. | Phogat et al 2020 |
| 18 | Cassia fistula | [Fabaceae](https://en.wikipedia.org/wiki/Fabaceae) | Cassia fistula is widely grown [ornamental plant](https://www.bing.com/ck/a?!&&p=45b3ec4cb0647bc8JmltdHM9MTcwMDQzODQwMCZpZ3VpZD0wZWIyYjU4NS00ZThiLTZiYTktMjYwNS1hN2U4NGYxMDZhNGImaW5zaWQ9NTY5Ng&ptn=3&ver=2&hsh=3&fclid=0eb2b585-4e8b-6ba9-2605-a7e84f106a4b&u=a1L3NlYXJjaD9xPU9ybmFtZW50YWwlMjBwbGFudCUyMHdpa2lwZWRpYSZmb3JtPVdJS0lSRQ&ntb=1) in tropical and subtropical areas has  inflammation reducing, wound healing, anti-microbial properties | Ruth et al. 2021 |
| 19 | Hibiscus rosa sinensis | [Malvaceae](https://en.wikipedia.org/wiki/Malvaceae) | Medicina**l**flowering plant found in tropics and subtropics which traditionally used for the management of bronchial asthma | Magdalita and San Pascual 2021 |
| 20 | Diospyros melanoxylon | [Ebenaceae](https://en.wikipedia.org/wiki/Ebenaceae) | It is a subtropical tree with edible fruit of astringent effect and seed is used to cure mental disorder. The bark is astringent used in diarrhea treatment. | Rathore 1972 |
| 21 | Ficus benghalensis | [Moraceae](https://en.wikipedia.org/wiki/Moraceae) | It is even green long lived tropical therapeutically valuable tree rich in phytochemicals employed for remedy many diseases. | Suganya et al. 2021 |
| 22 | Ficus religiose | [Moraceae](https://en.wikipedia.org/wiki/Moraceae) | It is an Ayurvedic deciduous  **tree** used for the treatment of various diseases. | Chandrasekar et al. 2010 |
| 23 | Schleichera oleosa | [Sapindaceae](https://en.wikipedia.org/wiki/Sapindaceae) | Multipurpose deciduous tree cultivated for lac, fruit and medicine. | Sarkar et al. 2022 |

| **Table S2**. Distribution of element in field soil of Ambagarh Chowki field soil, mg kg-1. | | | | | | |
| --- | --- | --- | --- | --- | --- | --- |
| **Soil** | **Cr** | **Cu** | **Ni** | **As** | **Cd** | **Pb** |
| S1 | 53.0 | 36.9 | 52.3 | 17.1 | 0.05 | 14.8 |
| S2 | 385 | 47.9 | 161 | 31.8 | 0.16 | 24.1 |
| S3 | 139 | 55.8 | 140 | 42.3 | 0.25 | 25.3 |
| S4 | 809 | 44.3 | 213 | 31.0 | 0.11 | 27.2 |
| S5 | 78.4 | 42.7 | 65.6 | 32.5 | 0.13 | 25.8 |
| S6 | 551 | 47.6 | 269 | 47.1 | 0.25 | 21.1 |
| S7 | 488 | 51.1 | 227 | 11.4 | 0.10 | 28.3 |
| S8 | 97.1 | 35.8 | 62.0 | 33.2 | 0.11 | 24.5 |
| S9 | 98.6 | 42.3 | 47.3 | 126 | 0.17 | 26.4 |
| S10 | 172 | 42.1 | 84.3 | 57.6 | 0.13 | 23.0 |
| S11 | 324 | 41.3 | 161 | 148 | 0.58 | 24.6 |
| S12 | 220 | 52.3 | 83.4 | 67.4 | 0.14 | 20.1 |
| S13 | 139 | 43.8 | 67.7 | 116 | 0.09 | 21.9 |
| S14 | 113 | 43.1 | 85.5 | 84.4 | 0.12 | 25.5 |
| S15 | 31.5 | 23.2 | 31.9 | 130 | 0.04 | 26.1 |
| S16 | 94.7 | 20.6 | 60.4 | 39.4 | 0.03 | 18.9 |
| S17 | 62.2 | 29.1 | 43.7 | 54.4 | 0.08 | 32.4 |
| S18 | 405 | 50.2 | 144 | 23.9 | 0.13 | 22.6 |
| S19 | 24.1 | 21.3 | 21.2 | 78.0 | 0.06 | 21.9 |
| S20 | 218 | 38.2 | 129 | 39.6 | 0.04 | 31.3 |
| S21 | 133 | 35.3 | 65.8 | 98.3 | 0.08 | 20.4 |
| S22 | 1100 | 34.8 | 227 | 17.5 | 0.06 | 14.7 |
| S23 | 54.6 | 40.3 | 40.7 | 325 | 0.12 | 37.1 |
| S24 | 197 | 34.6 | 96.5 | 239 | 0.08 | 28.4 |
| S25 | 35.9 | 53.5 | 51.0 | 40.9 | 0.12 | 54.5 |
| S26 | 170 | 37.4 | 102 | 40.3 | 0.09 | 27.9 |
| S27 | 35.2 | 26.0 | 21.4 | 248 | 0.12 | 23.6 |
| S28 | 27.6 | 24.3 | 19.0 | 40.6 | 0.09 | 29.9 |
| S29 | 100 | 34.4 | 63.9 | 83.8 | 0.07 | 18.0 |
| S30 | 105 | 22.0 | 60.6 | 38.0 | 0.06 | 15.3 |
| S31 | 41.9 | 23.2 | 23.1 | 149 | 0.14 | 26.6 |
| S32 | 68.3 | 38.0 | 58.5 | 28.8 | 0.15 | 28.1 |
| S33 | 84.7 | 35.2 | 42.0 | 24.0 | 0.11 | 14.2 |
| S34 | 125.7 | 30.7 | 49.8 | 41.5 | 0.10 | 13.0 |
| S35 | 59.4 | 44.0 | 67.8 | 26.5 | 0.12 | 27.0 |
| S36 | 105 | 37.6 | 76.5 | 22.2 | 0.08 | 17.7 |
| S37 | 134 | 38.8 | 91.4 | 59.6 | 0.33 | 27.5 |
| S38 | 37.9 | 25.1 | 25.0 | 121 | 0.07 | 14.8 |
| S39 | 51.2 | 30.8 | 28.3 | 23.1 | 0.07 | 11.1 |
| S40 | 17.9 | 12.4 | 15.5 | 62.4 | 0.04 | 15.7 |
| S41 | 91.4 | 25.8 | 58.3 | 25.7 | 0.04 | 20.4 |
| S42 | 53.3 | 39.8 | 47.3 | 135 | 0.04 | 22.3 |
| S43 | 105 | 46.0 | 66.8 | 140 | 0.31 | 30.4 |
| S44 | 125 | 35.1 | 74.9 | 208 | 0.10 | 34.1 |
| S45 | 86.3 | 40.8 | 63.3 | 25.8 | 0.10 | 27.6 |

| **Table S3**. Soil pollution indices. | | | |
| --- | --- | --- | --- |
| **Element** | **Cf** | **Ef** | **PLI** |
| **Cr** | 1.85 | 4.76 | 1.16 |
| **Ni** | 1.74 | 4.42 | 1.38 |
| **Cu** | 1.31 | 3.36 | 1.26 |
| **As** | 16.1 | 44.7 | 11.5 |
| **Cd** | 1.35 | 3.56 | 1.10 |
| Pb | 1.42 | 3.73 | 1.36 |
| Cf, Eef and PLI = Contamination index, enrichment factor and pollution load index. | | | |

| **Table S4**. Tf value of elements in the bark. | | | | | | |
| --- | --- | --- | --- | --- | --- | --- |
| Bark | **Cr** | **Ni** | **Cu** | **As** | **Cd** | **Pb** |
| AM | 0.05 | 0.21 | 0.28 | 0.04 | 0.29 | 0.19 |
| CA | 0.04 | 0.05 | 0.86 | 0.04 | 0.27 | 0.32 |
| LI | 0.04 | 0.06 | 0.45 | 0.03 | 2.86 | 0.31 |
| MK | 0.04 | 0.04 | 0.64 | 0.01 | 1.17 | 0.29 |
| MO | 0.03 | 0.02 | 0.32 | 0.02 | 0.07 | 1.53 |
| PE | 0.02 | 0.02 | 0.18 | 0.01 | 1.93 | 0.20 |
| TA | 0.08 | 0.03 | 0.37 | 0.01 | 0.67 | 0.14 |
| TC | 0.09 | 0.07 | 0.74 | 0.05 | 0.86 | 0.27 |
| TB | 0.04 | 0.04 | 0.21 | 0.02 | 1.87 | 0.10 |
| TI | 0.05 | 0.05 | 0.58 | 0.04 | 0.70 | 0.21 |
| AO | 0.05 | 0.03 | 0.30 | 0.02 | 0.36 | 0.17 |
| AN | 0.17 | 0.11 | 0.76 | 0.03 | 0.23 | 0.33 |
| AL | 0.04 | 0.04 | 0.19 | 0.02 | 0.51 | 0.27 |
| AI | 0.09 | 0.05 | 0.45 | 0.08 | 0.40 | 0.28 |
| BR | 0.21 | 0.15 | 0.58 | 0.20 | 1.16 | 1.23 |
| BL | 0.04 | 0.04 | 1.18 | 0.01 | 0.30 | 1.02 |
| CF | 0.05 | 0.03 | 0.21 | 0.02 | 3.34 | 0.18 |
| HR | 0.03 | 0.02 | 0.38 | 0.07 | 0.41 | 0.27 |
| DM | 0.18 | 0.23 | 0.41 | 0.08 | 0.46 | 0.56 |
| FB | 0.17 | 0.11 | 0.79 | 0.08 | 1.23 | 0.38 |
| FR | 0.09 | 0.07 | 0.46 | 0.02 | 0.36 | 0.17 |
| SO | 0.06 | 0.07 | 0.49 | 0.04 | 4.70 | 0.15 |
| AM, CA, LI, MK, MO, PE, TA, TB, TC, TI, AO, AN, AL,AI, BR, BL, CF, HR, DM, FB, FR and SO stand for Aegle Marmelos ([L.](https://en.wikipedia.org/wiki/Carl_Linnaeus)), Careya arborea Roxb., Lawsonia inermis, Murraya koenigii, Moringa oleifera, Phylanthus emblica, Terminalia Arjuna, Terminalia bellirica, Terminalia Chebura, Tramarindus indica, Albizizzia odoratissima, Acacia nilotica, Albizzia lebbek (L.) Benth, Azadirachta Indica, Bauhinia Recemose Lam, Buchanania lancan, Cassia fistula, Hibiscus rosa sinensis, Diospyros melanoxylon, Ficus benghalensis, Ficus religiose and Schleichera oleosa. | | | | | | |

| **Table S5.** Tf value of elements in leaf. | | | | | | |
| --- | --- | --- | --- | --- | --- | --- |
| **Leaf** | **Cr** | **Ni** | **Cu** | **As** | **Cd** | **Pb** |
| AM | 0.05 | 0.21 | 0.28 | 0.04 | 0.29 | 0.19 |
| AO | 0.04 | 0.05 | 0.86 | 0.04 | 0.27 | 0.32 |
| EJ | 0.04 | 0.06 | 0.45 | 0.03 | 2.86 | 0.31 |
| LI | 0.04 | 0.04 | 0.64 | 0.01 | 1.17 | 0.29 |
| MK | 0.03 | 0.02 | 0.32 | 0.02 | 0.07 | 1.53 |
| MO | 0.02 | 0.02 | 0.18 | 0.01 | 1.93 | 0.20 |
| PE | 0.08 | 0.03 | 0.37 | 0.01 | 0.67 | 0.14 |
| TA | 0.09 | 0.07 | 0.74 | 0.05 | 0.86 | 0.27 |
| TB | 0.04 | 0.04 | 0.21 | 0.02 | 1.87 | 0.10 |
| TC | 0.05 | 0.05 | 0.58 | 0.04 | 0.70 | 0.21 |
| AO | 0.05 | 0.03 | 0.30 | 0.02 | 0.36 | 0.17 |
| AN | 0.17 | 0.11 | 0.76 | 0.03 | 0.23 | 0.33 |
| AL | 0.04 | 0.04 | 0.19 | 0.02 | 0.51 | 0.27 |
| AI | 0.09 | 0.05 | 0.45 | 0.08 | 0.40 | 0.28 |
| TI | 0.21 | 0.15 | 0.58 | 0.20 | 1.16 | 1.23 |
| BR | 0.04 | 0.04 | 1.18 | 0.01 | 0.30 | 1.02 |
| BL | 0.05 | 0.03 | 0.21 | 0.02 | 3.34 | 0.18 |
| CF | 0.03 | 0.02 | 0.38 | 0.07 | 0.41 | 0.27 |
| HR | 0.18 | 0.23 | 0.41 | 0.08 | 0.46 | 0.56 |
| DM | 0.17 | 0.11 | 0.79 | 0.08 | 1.23 | 0.38 |
| FB | 0.09 | 0.07 | 0.46 | 0.02 | 0.36 | 0.17 |
| FR | 0.06 | 0.07 | 0.49 | 0.04 | 4.70 | 0.15 |
| SO | 0.06 | 0.07 | 0.49 | 0.04 | 0.29 | 0.19 |

| **Table S6**.Uptake (Uf) of element from bark to leaf. | | | | | | |
| --- | --- | --- | --- | --- | --- | --- |
| **Sample** | **Cr** | **Ni** | **Cu** | **As** | **Cd** | **Pb** |
| AM | 0.68 | 0.38 | 6.40 | 0.52 | 1.00 | 0.83 |
| AO | 2.34 | 2.29 | 1.17 | 6.27 | 1.90 | 2.42 |
| EJ | 0.63 | 0.90 | 1.56 | 1.28 | 0.29 | 1.24 |
| LI | 3.82 | 2.25 | 1.16 | 11.9 | 0.67 | 1.78 |
| MK | 0.57 | 0.94 | 0.82 | 1.30 | 0.35 | 0.58 |
| MO | 0.55 | 1.09 | 1.41 | 2.18 | 1.33 | 0.17 |
| PE | 1.23 | 2.77 | 0.90 | 1.80 | 0.21 | 0.90 |
| TA | 0.92 | 1.59 | 2.51 | 2.43 | 1.08 | 1.41 |
| TB | 3.10 | 2.31 | 1.09 | 2.64 | 0.67 | 2.77 |
| TC | 1.04 | 3.79 | 1.95 | 1.82 | 1.05 | 0.92 |
| AO | 0.19 | 0.54 | 3.55 | 1.60 | 0.91 | 2.24 |
| AN | 0.64 | 0.98 | 2.78 | 0.63 | 0.46 | 0.44 |
| AL | 0.58 | 1.66 | 1.87 | 0.15 | 0.42 | 0.39 |
| AI | 1.20 | 1.54 | 0.79 | 0.71 | 0.74 | 0.79 |
| TI | 1.07 | 0.76 | 1.31 | 0.48 | 1.19 | 0.71 |
| BR | 0.57 | 1.22 | 0.74 | 0.26 | 0.53 | 0.27 |
| BL | 1.76 | 9.29 | 0.11 | 1.75 | 1.71 | 0.45 |
| CF | 2.25 | 0.99 | 12.5 | 0.55 | 0.88 | 0.70 |
| HR | 0.82 | 1.49 | 1.55 | 1.36 | 3.59 | 0.81 |
| DM | 0.69 | 0.85 | 2.92 | 0.65 | 7.59 | 0.76 |
| FB | 0.77 | 0.69 | 0.41 | 1.12 | 0.66 | 0.77 |
| FR | 0.56 | 0.53 | 0.70 | 0.64 | 1.23 | 1.03 |
| SO | 0.67 | 0.60 | 1.25 | 0.32 | 0.44 | 0.72 |

| **Table S7**.Uptake (Uf) of element from bark to the fruit mesocarp. | | | | | | |
| --- | --- | --- | --- | --- | --- | --- |
| **Mesocarp** | **Cr** | **Ni** | **Cu** | **As** | **Cd** | **Pb** |
| AM | 1.16 | 0.60 | 1.10 | 3.46 | 0.82 | 2.30 |
| EJ | 3.76 | 3.59 | 1.98 | 0.82 | 0.15 | 0.51 |
| MO | 0.25 | 0.59 | 0.71 | 0.22 | 0.46 | 0.03 |
| SO | 1.35 | 1.60 | 2.34 | 1.29 | 0.71 | 1.87 |
| TI | 0.10 | 0.27 | 2.98 | 0.22 | 0.19 | 1.78 |
| AI | 0.88 | 0.64 | 0.97 | 0.15 | 0.52 | 0.21 |
| DM | 0.39 | 0.33 | 0.24 | 0.02 | 0.15 | 0.13 |

| **Table S8.** Uptake (Uf) of element from bark to the seed. | | | | | | |
| --- | --- | --- | --- | --- | --- | --- |
| **Seed** | **Cr** | **Ni** | **Cu** | **As** | **Cd** | **Pb** |
| AM | 0.49 | 0.56 | 1.05 | 0.77 | 0.41 | 0.92 |
| CA | 0.97 | 1.23 | 0.50 | 0.72 | 0.23 | 0.48 |
| EJ | 0.61 | 0.73 | 0.62 | 0.12 | 0.08 | 0.17 |
| LI | 2.24 | 2.38 | 1.34 | 1.71 | 0.20 | 0.57 |
| TA | 2.83 | 6.75 | 7.23 | 1.21 | 0.97 | 4.28 |
| TB | 1.00 | 1.31 | 1.86 | 0.68 | 0.42 | 0.74 |
| TC | 1.03 | 2.69 | 0.55 | 1.07 | 0.38 | 0.36 |
| TI | 0.07 | 0.28 | 1.02 | 0.23 | 0.13 | 0.85 |
| AO | 2.33 | 5.78 | 2.58 | 0.41 | 0.56 | 2.28 |
| AN | 0.51 | 4.66 | 1.26 | 0.05 | 0.42 | 0.19 |
| AL | 0.61 | 2.95 | 0.66 | 0.37 | 0.17 | 0.08 |
| AI | 0.66 | 0.61 | 1.76 | 0.04 | 0.30 | 0.06 |
| BL | 2.09 | 3.28 | 0.38 | 2.24 | 11.9 | 0.20 |
| CF | 0.95 | 2.27 | 1.61 | 0.21 | 0.87 | 0.55 |
| SO | 0.47 | 1.09 | 2.00 | 0.40 | 0.32 | 0.27 |

| **Table S9**. Effect of plant nature in concentration of element bark, leaf and seed, mg kg-1. | | | | | | | | | | | | | | | | | | |
| --- | --- | --- | --- | --- | --- | --- | --- | --- | --- | --- | --- | --- | --- | --- | --- | --- | --- | --- |
| **Family** | **Cr** | | | **Ni** | | | **Cu** | | | **As** | | | **Cd** | | | **Pb** | | |
| **B** | **L** | **S** | **B** | **L** | **S** | **B** | **L** | **S** | **B** | **L** | **S** | **B** | **L** | **S** | **B** | **L** | **S** |
| [Anacardiaceae](https://en.wikipedia.org/wiki/Anacardiaceae) | 4.23 | 7.5 | 8.9 | 1.67 | 15.5 | 5.49 | 36.4 | 3.9 | 13.7 | 0.45 | 0.78 | 1.0 | 0.03 | 0.05 | 0.37 | 13.5 | 6.02 | 2.6 |
| [Combretaceae](https://en.wikipedia.org/wiki/Combretaceae) | 4.15 | 7.2 | 7.2 | 2.54 | 6.90 | 7.48 | 12.0 | 22.7 | 32.0 | 1.64 | 3.53 | 1.71 | 0.10 | 0.08 | 0.05 | 4.58 | 6.47 | 6.8 |
| [Ebenaceae](https://en.wikipedia.org/wiki/Ebenaceae) | 7.83 | 5.4 |  | 6.05 | 5.12 |  | 11.3 | 32.8 |  | 7.24 | 4.74 |  | 0.03 | 0.26 |  | 7.15 | 5.43 |  |
| [Fabaceae](https://en.wikipedia.org/wiki/Fabaceae) | 10.9 | 5.6 | 4.7 | 3.81 | 3.51 | 6.62 | 13.4 | 38.4 | 17.0 | 2.48 | 1.14 | 0.42 | 0.09 | 0.07 | 0.05 | 9.8 | 5.18 | 3.9 |
| [Lecythidaceae](https://en.wikipedia.org/wiki/Lecythidaceae) | 16.2 | 38.1 | 16 | 10.1 | 23.1 | 12.5 | 46 | 53.9 | 23 | 1.36 | 8.54 | 0.98 | 0.04 | 0.07 |  | 8.4 | 20.34 | 4.0 |
| [Lythraceae](https://en.wikipedia.org/wiki/Lythraceae) | 7.57 | 28.9 | 17 | 5.75 | 12.9 | 13.7 | 18.4 | 21.3 | 24.7 | 0.6 | 7.14 | 1.03 | 0.30 | 0.20 | 0,01 | 8.04 | 14.3 | 4.6 |
| [Malvaceae](https://en.wikipedia.org/wiki/Malvaceae) | 4.63 | 3.8 |  | 2.21 | 3.3 |  | 14.8 | 22.9 |  | 4.25 | 5.79 |  | 0.14 | 0.49 | 0.06 | 7.35 | 5.97 | 4.0 |
| [Moraceae](https://en.wikipedia.org/wiki/Moraceae) | 5.6 | 3.7 |  | 3.14 | 1.9 |  | 17.0 | 9.8 |  | 2.88 | 2.53 |  | 0.04 | 0.04 |  | 5.65 | 4.94 |  |
| [Moringaceae](https://en.wikipedia.org/wiki/Moringa_(genus)) | 10.7 | 5.9 |  | 3.18 | 3.46 |  | 13.0 | 18.4 |  | 2.45 | 5.34 |  | 0.04 | 0.05 |  | 37.6 | 6.45 |  |
| [Myrtaceae](https://en.wikipedia.org/wiki/Myrtaceae) | 5.04 | 3.2 | 3.1 | 3.14 | 2.82 | 2.29 | 7.4 | 11.4 | 4.5 | 1.32 | 1.69 | 0.15 | 0.06 | 0.02 | 0.01 | 7.0 | 8.66 | 1.2 |
| [Phyllanthaceae](https://en.wikipedia.org/wiki/Phyllanthaceae) | 3.63 | 4.5 |  | 1.66 | 4.6 |  | 8.8 | 7.9 |  | 0.54 | 0.97 |  | 0.22 | 0.05 |  | 4.09 | 3.69 |  |
| [Rutaceae](https://indiabiodiversity.org/species/list?taxon=3037) | 7.02 | 4.5 | 3.9 | 10.6 | 5.08 | 9.71 | 19.4 | 49 | 12.4 | 0.91 | 0.81 | 0.72 | 0.11 | 0.05 | 0.01 | 5.33 | 3.53 | 3.3 |
| [Sapindaceae](https://en.wikipedia.org/wiki/Sapindaceae) | 5.35 | 3.6 | 2.5 | 4.97 | 2.96 | 5.42 | 18.1 | 22.6 | 36.2 | 1.57 | 0.51 | 0.63 | 0.46 | 0.21 | 0.15 | 4.59 | 3.33 | 1.2 |
| B, L and S stand for bark, leaf and seed. | | | | | | | | | | | | | | | | | | |

| **Table S10**. Loadings of trace elements measured in different organs of medicinal plants. | | | |
| --- | --- | --- | --- |
| **Element** | **Component** | | |
| **F1** | **F2** | **F3** |
| Na |  |  | 0.686 |
| Mg |  |  | 0.749 |
| Al |  | 0.891 |  |
| P |  |  | 0.935 |
| S |  |  | 0.764 |
| K |  |  | 0.820 |
| Cr |  | 0.793 |  |
| Mn |  | 0.778 |  |
| Fe |  | 0.923 |  |
| Co |  | 0.887 |  |
| Ni |  | 0.778 |  |
| Zn |  |  | 0.580 |
| As | 0.424 | 0.547 |  |
| Y | 0.864 |  |  |
| La | 0.964 |  |  |
| Ce | 0.611 | 0.728 |  |
| Pr | 0.982 |  |  |
| Nd | 0.985 |  |  |
| Sm | 0.983 |  |  |
| Eu | 0.716 |  |  |
| Gd | 0.985 |  |  |
| Tb | 0.977 |  |  |
| Dy | 0.972 |  |  |
| Ho | 0.964 |  |  |
| Er | 0.959 |  |  |
| Tm | 0.924 | 0.353 |  |
| Yb | 0.878 | 0.417 |  |
| Lu | 0.878 | 0.444 |  |
| Eigenvalue | 13.17 | 6.43 | 4.07 |
| % of variance | 41.15 | 20.09 | 12.72 |
| Cumulative % | 41.15 | 61.24 | 73.97 |

| **Table S11**. Observed PTDIs value of As, Cu, Pb and Cd. | | | | | | | | |
| --- | --- | --- | --- | --- | --- | --- | --- | --- |
| **Sample** | **As** | | **Cu** | | **Pb** | | **Cd** | |
| **B** | **L** | **B** | **L** | **B** | **L** | **B** | **L** |
| AM | 0.009 | 0.005 | 0.118 | 0.757 | 0.035 | 0.029 | 0.000 | 0.000 |
| CA | 0.014 | 0.085 | 0.460 | 0.539 | 0.084 | 0.203 | 0.000 | 0.001 |
| EJ | 0.013 | 0.017 | 0.074 | 0.114 | 0.070 | 0.087 | 0.001 | 0.000 |
| LI | 0.006 | 0.071 | 0.184 | 0.213 | 0.080 | 0.143 | 0.003 | 0.002 |
| MK | 0.009 | 0.011 | 0.270 | 0.220 | 0.071 | 0.041 | 0.002 | 0.001 |
| ML | 0.025 | 0.053 | 0.130 | 0.184 | 0.376 | 0.065 | 0.000 | 0.001 |
| PE | 0.005 | 0.010 | 0.088 | 0.079 | 0.041 | 0.037 | 0.002 | 0.000 |
| EA | 0.016 | 0.038 | 0.101 | 0.254 | 0.037 | 0.052 | 0.000 | 0.000 |
| TA | 0.008 | 0.022 | 0.071 | 0.078 | 0.027 | 0.075 | 0.002 | 0.001 |
| TC | 0.025 | 0.045 | 0.179 | 0.349 | 0.073 | 0.067 | 0.000 | 0.000 |
| TI | 0.008 | 0.013 | 0.205 | 0.727 | 0.034 | 0.076 | 0.000 | 0.000 |
| AO | 0.032 | 0.020 | 0.078 | 0.218 | 0.070 | 0.031 | 0.001 | 0.000 |
| AN | 0.022 | 0.003 | 0.114 | 0.213 | 0.054 | 0.021 | 0.000 | 0.000 |
| AL | 0.018 | 0.013 | 0.187 | 0.148 | 0.092 | 0.073 | 0.000 | 0.000 |
| AI | 0.020 | 0.010 | 0.111 | 0.145 | 0.058 | 0.041 | 0.000 | 0.000 |
| BR | 0.067 | 0.017 | 0.156 | 0.115 | 0.342 | 0.093 | 0.002 | 0.001 |
| BL | 0.004 | 0.008 | 0.364 | 0.039 | 0.135 | 0.060 | 0.000 | 0.001 |
| CF | 0.006 | 0.003 | 0.090 | 1.122 | 0.040 | 0.028 | 0.003 | 0.003 |
| HR | 0.043 | 0.058 | 0.148 | 0.229 | 0.074 | 0.060 | 0.001 | 0.005 |
| DM | 0.072 | 0.047 | 0.113 | 0.328 | 0.072 | 0.054 | 0.000 | 0.003 |
| FB | 0.029 | 0.032 | 0.140 | 0.057 | 0.069 | 0.053 | 0.001 | 0.000 |
| FR | 0.029 | 0.018 | 0.200 | 0.139 | 0.044 | 0.045 | 0.000 | 0.000 |
| SO | 0.016 | 0.005 | 0.181 | 0.226 | 0.046 | 0.033 | 0.005 | 0.002 |
| PTDIs = Provisional tolerable daily intake. | | | | | | | | |

| **Table** S**12**. Health assessment of As in the bark and leaf. | | | | | | |
| --- | --- | --- | --- | --- | --- | --- |
| **Sample** | **Bark** | | | **Leaf** | | |
| **EDI** | **HQ** | **CR** | **EDI** | **HQ** | **CR** |
| AM | 0.000156 | 0.000498 | 1.27E-09 | 8.06667E-05 | 1.34E-04 | 4.68E-08 |
| CA | 0.000227 | 0.001059 | 2.7E-09 | 0.001424 | 4.17E-02 | 1.46E-05 |
| EJ | 0.00022 | 0.000992 | 2.53E-09 | 0.000282 | 1.63E-03 | 5.72E-07 |
| LI | 0.0001 | 0.000206 | 5.26E-10 | 0.0011905 | 2.91E-02 | 1.02E-05 |
| MK | 0.000147 | 0.000443 | 1.13E-09 | 0.00019 | 7.42E-04 | 2.60E-07 |
| ML | 0.000408 | 0.003423 | 8.73E-09 | 0.000889333 | 1.63E-02 | 5.69E-06 |
| PE | 9.03E-05 | 0.000168 | 4.27E-10 | 0.000162167 | 5.40E-04 | 1.89E-07 |
| TA | 0.000263 | 0.001422 | 3.63E-09 | 0.000640333 | 8.43E-03 | 2.95E-06 |
| TB | 0.00014 | 0.000403 | 1.03E-09 | 0.00037 | 2.81E-03 | 9.85E-07 |
| TC | 0.000416 | 0.003553 | 9.06E-09 | 0.000757333 | 1.18E-02 | 4.12E-06 |
| TI | 0.000134 | 0.000368 | 9.37E-10 | 0.0002135 | 9.37E-04 | 3.28E-07 |
| AO | 0.000533 | 0.005832 | 1.49E-08 | 0.000335167 | 2.31E-03 | 8.08E-07 |
| AN | 0.000374 | 0.002877 | 7.34E-09 | 0.0000575 | 6.79E-05 | 2.38E-08 |
| AL | 0.000303 | 0.001886 | 4.81E-09 | 0.000214833 | 9.48E-04 | 3.32E-07 |
| AI | 0.000336 | 0.002321 | 5.92E-09 | 0.000163 | 5.46E-04 | 1.91E-07 |
| BR | 0.001117 | 0.025626 | 6.53E-08 | 0.000287167 | 1.69E-03 | 5.93E-07 |
| BL | 7.43E-05 | 0.000113 | 2.89E-10 | 0.000130167 | 3.48E-04 | 1.22E-07 |
| CF | 9.73E-05 | 0.000195 | 4.96E-10 | 0.0000535 | 5.88E-05 | 2.06E-08 |
| HR | 0.000709 | 0.010329 | 2.63E-08 | 0.000965333 | 1.91E-02 | 6.70E-06 |
| DM | 0.001207 | 0.029939 | 7.63E-08 | 0.000789167 | 1.28E-02 | 4.48E-06 |
| FB | 0.000482 | 0.004772 | 1.22E-08 | 0.000537333 | 5.93E-03 | 2.08E-06 |
| FR | 0.000479 | 0.004713 | 1.2E-08 | 0.000306833 | 1.93E-03 | 6.77E-07 |
| SO | 0.000262 | 0.00141 | 3.59E-09 | 8.46667E-05 | 1.47E-04 | 5.16E-08 |
|  | | | | | | |

| **Table** S**13.** Health assessment of Cd in the bark and leaf. | | | | | | |
| --- | --- | --- | --- | --- | --- | --- |
| **Sample** | **Bark** | | | **Leaf** | | |
| **EDI** | **HQ** | **CR** | **EDI** | **HQ** | **CR** |
| AM | 3.67E-06 | 1.11E-07 | 1.71E-10 | 3.67E-06 | 8.60E-08 | 2.02E-10 |
| CA | 6.5E-06 | 3.47E-07 | 3.03E-10 | 1.23E-05 | 9.70E-07 | 2.28E-09 |
| EJ | 9.83E-06 | 7.94E-07 | 4.58E-10 | 2.83E-06 | 5.13E-08 | 1.21E-10 |
| LI | 0.00005 | 2.05E-05 | 2.33E-09 | 3.37E-05 | 7.25E-06 | 1.71E-08 |
| MK | 3.28E-05 | 8.85E-06 | 1.53E-09 | 1.13E-05 | 8.19E-07 | 1.93E-09 |
| ML | 6.5E-06 | 3.47E-07 | 3.03E-10 | 8.67E-06 | 4.80E-07 | 1.13E-09 |
| PE | 3.65E-05 | 1.10E-05 | 1.70E-09 | 7.83E-06 | 3.92E-07 | 9.23E-10 |
| TA | 0.000006 | 2.96E-07 | 2.79E-10 | 6.5E-06 | 2.70E-07 | 6.35E-10 |
| TB | 3.58E-05 | 1.05E-05 | 1.67E-09 | 0.000024 | 3.68E-06 | 8.66E-09 |
| TC | 0.000007 | 4.03E-07 | 3.26E-10 | 7.33E-06 | 3.44E-07 | 8.09E-10 |
| TI | 7.83E-06 | 5.04E-07 | 3.65E-10 | 7.17E-06 | 3.28E-07 | 7.73E-10 |
| AO | 8.33E-06 | 5.71E-07 | 3.88E-10 | 3.83E-06 | 9.39E-08 | 2.21E-10 |
| AN | 5.5E-06 | 2.49E-07 | 2.56E-10 | 2.33E-06 | 3.48E-08 | 8.18E-11 |
| AL | 3.83E-06 | 1.21E-07 | 1.78E-10 | 2.83E-06 | 5.13E-08 | 1.21E-10 |
| AI | 4.5E-06 | 1.66E-07 | 2.10E-10 | 5.33E-06 | 1.82E-07 | 4.28E-10 |
| BR | 2.88E-05 | 6.83E-06 | 1.34E-09 | 1.53E-05 | 1.50E-06 | 3.53E-09 |
| BL | 5.17E-06 | 2.20E-07 | 2.41E-10 | 8.83E-06 | 4.99E-07 | 1.17E-09 |
| CF | 5.05E-05 | 2.10E-05 | 2.35E-09 | 4.45E-05 | 1.27E-05 | 2.98E-08 |
| HR | 2.27E-05 | 4.23E-06 | 1.06E-09 | 8.13E-05 | 4.23E-05 | 9.95E-08 |
| DM | 5.67E-06 | 2.64E-07 | 2.64E-10 | 0.000043 | 1.18E-05 | 2.78E-08 |
| FB | 8.33E-06 | 5.71E-07 | 3.88E-10 | 5.5E-06 | 1.93E-07 | 4.55E-10 |
| FR | 5.17E-06 | 2.20E-07 | 2.41E-10 | 6.33E-06 | 2.56E-07 | 6.03E-10 |
| SO | 7.68E-05 | 4.85E-05 | 3.58E-09 | 3.42E-05 | 7.47E-06 | 1.76E-08 |

| **Table** **S14**. Health assessment of Pb in the bark and leaf. | | | | | | |
| --- | --- | --- | --- | --- | --- | --- |
| **Sample** | **Bark** | | | **Leaf** | | |
| **EDI** | **HQ** | **CR** | **EDI** | **HQ** | **CR** |
| AM | 0.000589 | 0.00019 | 7.27108E-09 | 0.000410 | 0.000134465 | 4.00E-09 |
| CA | 0.001401 | 0.001075 | 4.11235E-08 | 0.000488 | 0.000167601 | 4.99E-09 |
| EJ | 0.001167 | 0.000746 | 2.85315E-08 | 0.003391 | 0.008100177 | 2.41E-07 |
| LI | 0.001341 | 0.000985 | 3.76806E-08 | 0.001443 | 0.001466438 | 4.36E-08 |
| MK | 0.001186 | 0.000771 | 2.94766E-08 | 0.002381 | 0.003994489 | 1.19E-07 |
| ML | 0.006272 | 0.021555 | 8.24481E-07 | 0.000686 | 0.000331455 | 9.86E-09 |
| PE | 0.000681 | 0.000254 | 9.71754E-09 | 0.001076 | 0.000815275 | 2.43E-08 |
| TA | 0.000615 | 0.000207 | 7.92503E-09 | 0.000615 | 0.00026646 | 7.93E-09 |
| TB | 0.00045 | 0.000111 | 4.24575E-09 | 0.000869 | 0.000532114 | 1.58E-08 |
| TC | 0.001223 | 0.00082 | 3.13488E-08 | 0.001245 | 0.001092286 | 3.25E-08 |
| TI | 0.000568 | 0.000177 | 6.76581E-09 | 0.001121 | 0.000885305 | 2.63E-08 |
| AO | 0.001159 | 0.000736 | 2.81577E-08 | 0.001273 | 0.001141365 | 3.4E-08 |
| AN | 0.000907 | 0.000451 | 1.72355E-08 | 0.000512 | 0.00018456 | 5.49E-09 |
| AL | 0.001534 | 0.001289 | 4.93035E-08 | 0.00035 | 8.61781E-05 | 2.56E-09 |
| AI | 0.000959 | 0.000504 | 1.92655E-08 | 0.001211 | 0.001033308 | 3.07E-08 |
| BR | 0.005692 | 0.017752 | 6.79005E-07 | 0.000682 | 0.00032744 | 9.74E-09 |
| BL | 0.002246 | 0.002764 | 1.05712E-07 | 0.001555 | 0.001703318 | 5.07E-08 |
| CF | 0.000662 | 0.00024 | 9.18049E-09 | 0.001004 | 0.000709912 | 2.11E-08 |
| HR | 0.001225 | 0.000822 | 3.14515E-08 | 0.000466 | 0.000152822 | 4.55E-09 |
| DM | 0.001192 | 0.000779 | 2.97839E-08 | 0.000995 | 0.000697123 | 2.07E-08 |
| FB | 0.001151 | 0.000726 | 2.77543E-08 | 0.000904 | 0.000575836 | 1.71E-08 |
| FR | 0.000731 | 0.000293 | 1.11996E-08 | 0.000888 | 0.000555217 | 1.65E-08 |
| SO | 0.000765 | 0.000321 | 1.2271E-08 | 0.000756 | 0.000402825 | 1.2E-08 |

| **Table** **S15**. HI value for As, Pb, Cd and Cu in bark and leaf. | | |
| --- | --- | --- |
| **Sample** | **Bark** | **Leaf** |
| AM | 0.00092779 | 1.01E-02 |
| CA | 0.005751336 | 5.48E-02 |
| EJ | 0.001831311 | 3.32E-03 |
| LI | 0.00179173 | 3.39E-02 |
| MK | 0.002471138 | 1.91E-03 |
| ML | 0.025269469 | 1.77E-02 |
| PE | 0.000565452 | 9.14E-04 |
| TA | 0.001804126 | 1.01E-02 |
| TB | 0.000611171 | 4.01E-03 |
| TC | 0.004924075 | 1.48E-02 |
| TI | 0.001263181 | 1.11E-02 |
| AO | 0.006673874 | 3.31E-03 |
| AN | 0.00355051 | 9.29E-04 |
| AL | 0.003771378 | 2.35E-03 |
| AI | 0.003035933 | 1.23E-03 |
| BR | 0.043804111 | 3.62E-03 |
| BL | 0.005143868 | 1.08E-03 |
| CF | 0.00059376 | 2.18E-02 |
| HR | 0.011530932 | 2.07E-02 |
| DM | 0.030935 | 1.52E-02 |
| FB | 0.00583606 | 6.54E-03 |
| FR | 0.005690501 | 2.66E-03 |
| SO | 0.002340259 | 1.25E-03 |
